1 **Separating overlapping bat calls with a bi-directional long short-term**  
2 **memory network**

3 **Using deep neural network to separate overlapping bat calls**

4 Kangkang Zhang<sup>1</sup>, Tong Liu<sup>1</sup>, Shengjing Song<sup>1</sup>, Xin Zhao<sup>1</sup>, Shijun Sun<sup>2</sup>, Walter

5 Metzner<sup>3</sup>, Jiang Feng<sup>1,4\*</sup>, Ying Liu<sup>1\*</sup>

6 <sup>1</sup>Jilin Provincial Key Laboratory of Animal Resource Conservation and Utilization,

7 Northeast Normal University, Changchun, China. <sup>2</sup>School of Environment, Northeast

8 Normal University, Changchun, China. <sup>3</sup>Department of Integrative Biology and

9 Physiology, University of California, Los Angeles, California, USA. <sup>4</sup>Collage of  
10 Animal Science and Technology, Jilin Agricultural University, Changchun, China.

11

12 \*Correspondence

13 E-mail: [liuy252@nenu.edu.cn](mailto:liuy252@nenu.edu.cn) (YL)

14 E-mail: [fengj@nenu.edu.cn](mailto:fengj@nenu.edu.cn) (JF)

15

16 **Abstract**

17 Acquiring clear and usable audio recordings is critical for acoustic analysis of

18 animal vocalizations. Bioacoustics studies commonly face the problem of overlapping

19 signals, but the issue is often ignored, as there is currently no satisfactory solution.

20 This study presents a bi-directional long short-term memory (BLSTM) network to

21 separate overlapping bat calls and reconstruct waveform audio sounds. The separation

22 quality was evaluated using seven temporal-spectrum parameters. The applicability of  
23 this method for bat calls was assessed using six different species. In addition,  
24 clustering analysis was conducted with separated echolocation calls from each  
25 population. Results showed that all syllables in the overlapping calls were separated  
26 with high robustness across species. A comparison between the seven  
27 temporal-spectrum parameters showed no significant difference and negligible  
28 deviation between the extracted and original calls, indicating high separation quality.  
29 Clustering analysis of the separated echolocation calls also produced an accuracy of  
30 93.8%, suggesting the reconstructed waveform sounds could be reliably used. These  
31 results suggest the proposed technique is a convenient and automated approach for  
32 separating overlapping calls using a BLSTM network. This powerful deep neural  
33 network approach has the potential to solve complex problems in bioacoustics.

#### 34 **Author summary**

35 In recent years, the development of recording techniques and devices in animal  
36 acoustic experiment and population monitoring has led to a sharp increase in the  
37 volume of sound data. However, the collected sound would be overlapped because of  
38 the existence of multiple individuals, which laid restrictions on taking full advantage  
39 of experiment data. Besides, more convenient and automatic methods are needed to  
40 cope with the large datasets in animal acoustics. The echolocation calls and  
41 communication calls of bats are variable and often overlapped with each other both in  
42 the recordings from field and laboratory, which provides an excellent template for  
43 research on animal sound separation. Here, we firstly solved the problem of

44 overlapping calls in bats successfully based on deep neural network. We built a  
45 network to separate the overlapping calls of six bat species. All the syllables in  
46 overlapping calls were separated and we found no significant difference between the  
47 separated syllables with non-overlapping syllables. We also demonstrated an instance  
48 of applying our method on species classification. Our study provides a useful and  
49 efficient model for sound data processing in acoustic research and the proposed  
50 method has the potential to be generalized to other animal species.

## 51 **Introduction**

52 The structural identification of vocal units is essential in animal acoustic studies for  
53 sound feature analysis, sound emitter recognition, and species identification and  
54 monitoring. However, wild animal monitoring, both in the field and in the laboratory,  
55 often involves problems caused by the overlapping of different vocal units in time and  
56 frequency space, which prevents the components from being suitable for parameter  
57 analysis. As a result, the separation of overlapping sounds is an important task in  
58 bioacoustic signal processing. However, existing analysis software often struggles to  
59 process overlapping calls and previous research on the acoustic identification of  
60 animals primarily focuses on extracting target signals from background noise for  
61 species classification or population monitoring [1-4]. The process of separating  
62 overlapping calls from mixed sounds has received little attention to date and  
63 researchers conventionally abandon sounds that overlap in both time and frequency,  
64 requiring an extension of the experimental period to obtain sufficient non-overlapping  
65 recordings [5, 6]. As such, an effective method for successfully and automatically

66 separating overlapping calls would be of significant interest and benefit to animal  
67 researchers.

68 Previous studies using deep neural networks have produced promising results for  
69 automated sound recognition in complex acoustic environments for animal species  
70 recognition and classification [6-8]. However, in this study, we consider the more  
71 difficult task of separating different types of syllables from overlapping calls and  
72 reconstructing sound waves from these separated signals. Existing techniques used for  
73 animal sound separation often require prohibitive quantities of labelled data. For  
74 example, multiple-instance machine learning (MIML) algorithms were proposed for  
75 use in sound feature extraction and species identification in birds [1]. However, this  
76 technique requires a cropped mask of a signal segment (without overlap) in order to  
77 extract each syllable.

78 Deep learning networks have been applied to bioacoustic studies but have primarily  
79 been used for classification. For instance, convolutional bidirectional recurrent neural  
80 networks (CBRNNs) have been used to identify the presence of bird calls in audio  
81 samples [4]. Acoustic features were learned by the network (a classifier) and the  
82 presence or absence of a bird call was output as an indicator. Convolutional neural  
83 networks (CNNs) have been used to predict the presence of a search-phase bat  
84 echolocation call in spectrograms. This binary classification problem was used to  
85 detect the presence of bats [2]. To our knowledge, the use of deep learning techniques  
86 to separate animal calls that overlap in both time and frequency space has yet to be  
87 reported.

88 Multiple studies have been conducted using deep learning-based supervised speech  
89 separation with humans. Early systems included shallow models that performed a  
90 linear transformation of given mixture features during the prediction time interval.  
91 This has included Gaussian mixture models [9], support vector machines [10], and  
92 non-negative matrix factorization [11]. However, in real-world scenarios, the mapping  
93 relationship between mixture signals and sources is typically a nonlinear  
94 transformation. Nonlinear models, such as deep neural networks (DNNs), are  
95 therefore highly applicable because of their ability to identify nonlinear structures in  
96 audio signals [12-14]. Additionally, recurrent neural networks (RNNs) that exhibit the  
97 temporal behavior of a time sequence can be trained to predict time-frequency masks  
98 for target signals and separate sources from a mixed waveform [15]. Specifically, long  
99 short-term memory (LSTM) networks, a variation of RNN models that exhibit strong  
100 learning capabilities and simple construction, have been widely used for word and  
101 continuous speech recognition [16-18]. By concatenating two separate LSTM  
102 networks, bidirectional LSTMs (BLSTMs) can predict each element of a sequence  
103 based on past and future context and can naturally account for the temporal dynamics  
104 of speech. These models are typically faster and more accurate than standard RNNs in  
105 frame-by-frame phoneme classification [19]. In addition, the BLSTM network can  
106 compensate for exploding and vanishing gradient issues that can occur during the  
107 training of standard RNN models [20]. At present, BLSTMs have achieved  
108 state-of-the-art performance for speech recognition [14, 21], natural language  
109 processing [22, 23], and speaker-independent speech separation [24]. As such, a

110 BLSTM model was selected in this study for overlapping bat call separation.

111 Echolocating bats have two vocal repertoires, stereotypical echolocation calls for  
112 orientation and a variety of communication calls for social activities [25-27].  
113 Recordings from both field and laboratory studies indicate that utterances from  
114 individual bats often overlap in both time and frequency, which provides an excellent  
115 template for research on overlapping sound separation in animals. The primary  
116 objective of this study is to develop a technique for separating two target signals  
117 (echolocation and socialization calls) from mixtures of acoustic sounds. Although  
118 deep learning has been employed in the acoustic classification of multiple species,  
119 including nonhuman primates [28], birds [4], whales [5], and bats [2, 3], the goal of  
120 the present study is distinct from these previous cases in which deep neural networks  
121 were primarily used as classifiers.

122 Both overlapping and non-overlapping calls (of both echolocation and  
123 communication types) were recorded from each of the collected bat species studied in  
124 our previous work. We developed a BLSTM network and used the recorded  
125 non-overlapping calls to train the model. Recorded overlapping calls were input to the  
126 trained model and separated. Independent sound files were then reconstructed for each  
127 separated signal. The correctness of these separated signals was measured by  
128 comparing the temporal-spectrum parameters between separated calls and the initially  
129 recorded (non-overlapping) calls from each species. Finally, clustering analysis was  
130 conducted to classify the bats using separated echolocation calls, which provided a  
131 practical application of the proposed technique.

## 132 Results

133 The proposed algorithm performed well and achieved high accuracy in separating  
134 overlapping calls for each of the six species. The BLSTM model was iteratively  
135 trained until the training and validation losses reached a minimum. Loss is a  
136 summation of errors made with each sample in the training or validation sets and  
137 measures how well the model adapts during optimization. Training loss for this model  
138 decreased significantly in the first epoch. The validation loss function tended toward  
139 an asymptotic value, indicating the training algorithm had converged (S2 Fig). The  
140 BLSTM model converged slightly faster when training with CF bat samples (as  
141 opposed to FM samples).

142 All echolocation and communication calls in the overlapping signals were  
143 correctly extracted during the separation procedure, regardless of their pulse duration  
144 or energy characteristics (see Table 1 and Fig 1). In addition, low-intensity FM  
145 components in echolocation pulses were successfully extracted from three CF bat  
146 species (Figs 1d, 1e, and 1f).

147 **Table 1. Separation results.**

| Species                          | Call type     | Number of syllable types | Number of syllables in overlapping calls | Number of overlapping syllables | Number of separated syllables |
|----------------------------------|---------------|--------------------------|------------------------------------------|---------------------------------|-------------------------------|
| <i>Rhinolophus ferrumequinum</i> | Echolocation  | 1                        | 14                                       | 14                              | 14                            |
|                                  | Communication | 4                        | 8                                        | 8                               | 8                             |
| <i>Vespertilio sinensis</i>      | Echolocation  | 1                        | 21                                       | 13                              | 13                            |
|                                  | Communication | 4                        | 8                                        | 8                               | 8                             |
| <i>Hipposideros armiger</i>      | Echolocation  | 1                        | 28                                       | 19                              | 19                            |
|                                  | Communication | 6                        | 13                                       | 13                              | 13                            |
| <i>Myotis</i>                    | Echolocation  | 1                        | 54                                       | 36                              | 36                            |

|                      |               |   |    |    |    |
|----------------------|---------------|---|----|----|----|
| <i>macrodactylus</i> | Communication | 6 | 15 | 15 | 15 |
| <i>Rhinolophus</i>   | Echolocation  | 1 | 42 | 30 | 30 |
| <i>pusillus</i>      | Communication | 6 | 10 | 10 | 10 |
| <i>Ia io</i>         | Echolocation  | 1 | 26 | 16 | 16 |
|                      | Communication | 4 | 11 | 11 | 11 |

148

149 **Fig 1. Spectrograms from original recordings of overlapping calls and calls separated by**  
150 **the BLSTM network.** The first graph represents each line of the original overlapping calls  
151 and the second and third graphs show the separated echolocation and communication calls,  
152 respectively.

153

154 A comparison of seven temporal-spectrum parameters from the separated calls  
155 and the original recorded non-overlapping calls showed no significant differences (Fig  
156 2 and S3 Table). In addition, parameter deviations in separated calls and original  
157 non-overlapping calls showed minimal RMSE values for both echolocation and  
158 communication signals (Fig 3 and Fig 4). Clustering analysis performed with  
159 separated echolocation calls produced an accuracy of 93.8% across species (Fig 5).

160

161 **Fig 2. Comparisons between the separated and original calls.** Two principle  
162 components extracted from seven temporal-spectral parameters were used in the study.  
163 Results for echolocation and communication calls are shown in (A-F) and (G-L),  
164 respectively.

165 **Fig 3. A comparison of deviations for separated and original echolocation calls.**

166 The RMSE value is shown under each plot. The vertical axis represents values for



167 each parameter and the horizontal axis represents the number of syllables measured.  
168 The red triangles represent separated calls and the blue dots represent original calls.  
169 Abbreviations include duration (duration), Fstart (starting frequency), Fend (ending  
170 frequency), Fpeak (peak frequency), Fmin (minimum frequency), Fmax (maximum  
171 frequency), and bandw (bandwidth).

172 **Fig 4. A comparison of deviations in separated and original communication calls.**

173 The RMSE value is shown under each plot. The vertical axes and abbreviations are  
174 the same in Fig 3.

175 **Fig 5. Clustering analysis for six bat species based on their separated**  
176 **echolocation calls.** Overlapping echolocation signals cannot be used for species  
177 identification until after separation.

178

179 **Discussion**

180 The BLSTM network used in the present study achieved high accuracy in  
181 separating overlapping echolocation and communication calls from bats. The training  
182 and validation loss for the model also exhibited fast convergence and high robustness  
183 for bat vocalizations. In particular, the separated calls extracted by the proposed  
184 algorithm were reconstructed as waveform files with nearly the same quality as the  
185 non-overlapping calls, suggesting BLSTM networks to be useful tools for separating  
186 signals in future bioacoustic research, such as sound analysis, acoustic identification,  
187 species classification, and wild animal monitoring.

188 It was difficult to compare the performance of this algorithm with that of previous

189 studies, primarily because of differences in the experimental procedure. However, a  
190 comparison of temporal-spectrum parameters between separated calls and  
191 non-overlapping calls was included as an evaluation metric. The seven parameters  
192 used in this study are commonly used in bat studies to describe the temporal-spectral  
193 features of syllables [26, 29]. Statistical results for this comparison showed no  
194 significant differences and small deviations in parameters between separated calls and  
195 original recordings, indicating the system was able to separate calls without affecting  
196 syllable quality. In addition, clustering analysis conducted with reconstructed  
197 echolocation calls was highly accurate (93.8%) for species classification, indicating  
198 that calls separated from overlapping signals could be used to synthesize initial data.

199       The BLSTM network exhibited good performance across all six bat species using  
200 both narrow and broad time-frequency calls. It also successfully separated different  
201 syllable types from both overlapping echolocation and communication calls (Table 1,  
202 Fig 1). No species-specific *a priori* knowledge or particular acoustic sensor was  
203 directly encoded into the system, making it generalizable to other animal populations  
204 with additional training data. Although the dichotomy between communication and  
205 echolocation calls is relatively drastic, the proposed separation system has potential  
206 applications for other species, as such mixtures are very common in bats. In the future,  
207 more complex emitter-independent separation could be conducted using the proposed  
208 system, such as combinations of echolocation or social calls from other animals.

209 While deep learning models generally perform better when provided with more data,  
210 training with bat calls requires fewer samples than human speech separation, in which

211 available training sets can exceed hundreds of hours [13]. One possible reason for this  
212 may be the high signal-to-noise ratio (SNR) of bat sounds recorded with high-quality  
213 ultrasound devices. Previous studies have indicated that a high SNR can improve  
214 separation accuracy [30] and our results suggest this model was suitable for use with  
215 small, high-quality datasets. Although the sound data in this study were sampled in  
216 controlled lab conditions, producing recordings that were essentially free of  
217 background noise, acoustic analysis software could potentially optimize the separation  
218 further by excluding any background noise that was present in the signal.

219 Future studies will also assess the performance of this network for other animal  
220 species. Stereotypical patterns and clearly classifiable syllables have been observed in  
221 the vocalizations of birds, non-human primates, whales, dolphins, and several other  
222 species [31-33]. Features used in the proposed BLSTM were log spectral magnitudes,  
223 which can be acquired from any vocal sound. This could potentially lead to robust  
224 software that is not specific to a certain species or task. The model could also be  
225 generalized to other animals, though limitations may exist. In addition to the quality  
226 and quantity of training samples, hyper-parameters must be tuned in accordance with  
227 the data [34, 35].

## 228 **Conclusion**

229 A sound separation model was proposed for extracting bat calls, achieving  
230 excellent results. This is the first experimental evidence that the BLSTM model is  
231 suitable for separating overlapping bioacoustic signals. These results provided a new  
232 source for sound data analysis in animal acoustics research, which may contribute to

233 sample sizes and improve efficiency. This study also demonstrates the potential of  
234 deep neural networks for applications to animal vocalization research, including  
235 species classification and speech separation.

## 236 **Materials and Methods**

### 237 **Sound recording and data preparation**

238 **Species selection and sound sources.** Echolocation calls from bats are primarily  
239 composed of constant frequency (CF) components and frequency modulated (FM)  
240 components. Social calls are composed of CF, FM, and noise-burst (NB) components.  
241 FM calls have short pulse durations and wide bandwidths. As such, they overlap with  
242 social calls less in time but more in frequency. In contrast, CF calls have long pulse  
243 durations and narrow bandwidths. They overlap with social calls more in time but less  
244 in frequency. In consideration of the varied overlapping patterns found in bat calls, we  
245 selected both CF bats (*Rhinolophus ferrumequinum*, *Hipposideros armiger*, and  
246 *Rhinolophus pusillus*) and FM bats (*Vespertilio sinensis*, *Myotis macrodactylus*, and  
247 *Ia io*) to test the separation capabilities of the proposed network, including six  
248 different species to test method generalizability.

249 Source sound files from *V. sinensis*, *M. macrodactylus*, *R. ferrumequinum*, *R.*  
250 *pusillus*, and *H. armiger* were collected from previous studies in our lab (S1 Table).  
251 Sound files for *Ia io* were selected from unpublished data as follows. Bats captured  
252 from the field were housed in a husbandry room with abundant food and fresh water.  
253 During each sound recording experiment, 4–5 bats were transferred to a temporary  
254 cage. Sound recordings were collected using the Avisoft UltraSoundGate 116H

255 (Avisoft Bioacoustics, Berlin, Germany) and a condenser ultrasound microphone  
256 (CM16/CMPA, Avisoft Bioacoustics). The sampling frequency was set to 375 kHz at  
257 16 bits. The recording experiment lasted five days in order to acquire a sufficient  
258 number of recordings, beginning at 18:00 and finishing at 6:00 the following morning.  
259 S1 Table shows sample numbers and locations for the bats, as well as the total  
260 duration of sound files selected for the study. All experimental procedures complied  
261 with the ABS/ASAB guidelines for the Use of Animals in Research and were  
262 approved by the Committee on the Use and Care of Animals at the Northeast Normal  
263 University (approval number: NENU-W-2010–101).

264 **Sound analysis.** The total duration of recorded sound files (i.e., original recording  
265 files) used for each bat species is shown in S1 Table. We employed Avisoft-SASLab  
266 Pro (Version 5.2.12, Avisoft Bioacoustics, Berlin, Germany) to identify  
267 non-overlapping and overlapping syllables in echolocation and communication calls.  
268 These syllables and calls were described and classified following the nomenclature  
269 developed by Kanwal, Matsumura (36) and Ma, Kobayasi (37). The recorded  
270 non-overlapping calls were used for preparing training files of each call type and the  
271 recorded overlapping calls were used for separation.

272 **Data preparation.** Supervised machine learning algorithms use training samples to  
273 “learn” the steps required for completing a task. The training phase in this study  
274 involved preparing clear and non-overlapping echolocation and communication calls,  
275 selected from original recording sounds. In this process, the BLSTM network learned  
276 features found in both call types.

277 Training samples consisted of randomly selected non-overlapping syllables in  
278 echolocation and communication calls from each bat species (in the original  
279 recordings), with signal-to-noise ratios (SNRs) above  $-20$  dB. The echolocation  
280 training files contained 1,300–6,240 pulses and the communication training files  
281 contained 780–1,800 syllables (S1 Table). Although the quantity of selected syllables  
282 varied between studies, the data was sufficient for model training. Efforts were made  
283 to include roughly equivalent quantities of each syllable type. Time intervals between  
284 syllables in the training files were consistent with those of the original recordings. The  
285 lengths of training files for echolocation and communication calls were the same for  
286 each bat species (S1 Table).

### 287 **Model training and call separation**

288 **Model structure and training stage.** We developed a network with four BLSTM  
289 layers, followed by one feedforward layer (Fig 6). Each BLSTM layer included one  
290 forward and one backward basic LSTM layer, both of which were added with dropout  
291 functions (`tensorflow.nn.rnn_cell.DropoutWrapper`). Each BLSTM layer contained  
292 300 hidden cells and the feedforward layer corresponded to the embedding dimension  
293 (i.e., a 3D matrix with depth  $N=40$  in this experiment). Stochastic gradient descent  
294 with a momentum of 0.9 and a fixed learning rate of  $10^{-3}$  was used for training. The  
295 tanh activation function and the Adam optimizer were adopted to support adaptive  
296 learning rates and faster convergence. The structure and hyper-parameters for the  
297 model were designed based on the work of Hershey, Chen (21).

298 **Fig 6. The BLSTM model architecture and workflow graph.**

299 The model was trained using the files for one bat species in each trial.  
300 Echolocation and communication call training files were loaded using the librosa  
301 (version 0.6.2) Python package. Frames from the two sound files were read and added  
302 together to create sound mixtures. Sound features used for training (log spectral  
303 magnitudes) were extracted from this mixture. The extraction process was completed  
304 using a short-time Fourier transform (STFT) with a Hamming window (length of 512  
305 and shift of 256).

306 The mixture from each bat species was then segmented into 100-frame samples,  
307 all of which were divided into a training set and a validation set using a ratio of 2:1  
308 (see S1 Table for detailed sample quantities). The training set, validation set, and  
309 indicator labels were combined and input to the model. The validation set was used to  
310 optimize tuning parameters and evaluate call separation performance. Indicator labels  
311 were set to 0 or 1, representing the two types of calls in the mixture. Ideal binary  
312 masks were used to train the network and gradients were calculated using shuffled  
313 mini-batches (batch size of 128) from larger segments.

314 The output of this model was a set of embeddings that included learned features  
315 for both echolocation and communication calls. In this framework, the deep network  
316 assigned embedding vectors to each time-frequency bin in the spectrogram. The  
317 network then minimized the distance between embeddings dominated by the same  
318 call type in each bin while maximizing the distance between embeddings dominated  
319 by different call types. The output was then compared with the validation set and  
320 indicator labels to calculate loss, which was back propagated from the output to the

321 input through each layer. Model weights and parameters were then updated based on  
322 the calculated loss and training was completed after sufficient iteration epochs.

323 **Separation stage.** In this stage, overlapping echolocation and communication calls  
324 were randomly selected from the original recordings to create a sound file of test sets,  
325 used for separation. The log spectral magnitudes of the overlapping calls were then  
326 extracted, combined into samples, and input to the trained model. The phases of calls  
327 extracted from the sound files were also saved for use in sound reconstruction. The  
328 trained model then output embeddings for each segment (100 frames) in a process  
329 similar to the training stage. Embeddings were clustered using the k-means method  
330 from Scikit-learn (Version 0.20.0) to produce time-frequency masks. The number of  
331 clusters corresponded to the number of call types in the mixture (2 - echolocation and  
332 communication). These masks and the clustering method were then used to determine  
333 which parts of each segment in the overlapped calls would be preserved or neglected  
334 based on their correspondence to each call type. For example, if the maximum  
335 magnitudes were more likely to belong to echolocation calls, the related mask values  
336 were set to 1 and the others were set to 0, allowing the echolocation calls to be separated  
337 correctly. Finally, output calls were reconstructed using the inverse fast Fourier  
338 transform (IFFT) function `numpy.fft.ifft` in NumPy (Version 1.15.1). The IFFT  
339 transformed the magnitude into a wave using phase information saved at the beginning  
340 of the separation stage. The model produced two waveform files, each containing one  
341 call type. Additional detail concerning the sound separation algorithms can be found in  
342 the work of Hershey (2016).



### 343 **Model evaluation**

344       The quality of reconstructed echolocation and communication calls was assessed  
345 by comparing their temporal-spectrum parameters to the non-overlapping calls  
346 selected from the original recording files (excluding training data). Avisoft-SASLab  
347 Pro was used for automatic parameter measurements of duration, bandwidth, peak  
348 frequency, minimum frequency, maximum frequency, starting frequency, and ending  
349 frequency. A t-SNE (t-distributed stochastic neighbor embedding - R3.6.1 package)  
350 analysis was adopted for dimensionality reduction. Two dimensions were extracted  
351 from these seven parameters for original and separated syllables and compared with  
352 one-way ANOVA (aov in R3.6.1) or two-sided Wilcoxon signed-rank tests  
353 (wilcox.test in R3.6.1), depending on their fit to a normal Gaussian distribution. The  
354 significance level was set to 0.05 for all tests. We adopted the root mean square error  
355 (RMSE) to measure and avoid obscuring individual variations between reconstructed  
356 and original calls. Clustering analysis was conducted using the reconstructed  
357 echolocation calls from the six bat species, to assess whether the separated calls could  
358 be further used in species classification.

### 359 **Acknowledgements**

360       We are grateful to Dr. Yanhong Xiao of the Experimental Center of the School of  
361 Environment at Northeast Normal University, for her assistance in acquiring the  
362 experimental materials. We thank LetPub ([www.letpub.com](http://www.letpub.com)) for its linguistic  
363 assistance during the preparation of this manuscript.

### 364 **Author contributions**

- 365 **Conceptualization:** Kangkang Zhang, Walter Metzner.
- 366 **Data curation:** Tong Liu, Shengjing Song, Xin Zhao.
- 367 **Formal Analysis:** Kangkang Zhang, Tong Liu.
- 368 **Methodology:** Kangkang Zhang, Ying Liu, Jiang Feng.
- 369 **Software:** Kangkang Zhang, Shijun Sun.
- 370 **Funding acquisition:** Ying Liu, Jiang Feng, Walter Metzner.
- 371 **Supervision:** Jiang Feng.
- 372 **Visualization:** Kangkang Zhang, Tong Liu.
- 373 **Writing – original draft:** Kangkang Zhang, Ying Liu.
- 374 **Writing – review & editing:** Ying Liu, Walter Metzner.
- 375 **Competing interests**
- 376       The authors have declared that no competing interests exist.

## 377 **References**

- 378 1. Briggs F, Lakshminarayanan B, Neal L, Fern XZ, Raich R, Hadley SJK, et al. Acoustic  
379 classification of multiple simultaneous bird species: A multi-instance multi-label approach.  
380 2012;131(6):4640-50. doi: 10.1121/1.4707424.
- 381 2. Aodha OM, Gibb R, Barlow KE, Browning E, Firman M, Freeman R, et al. Bat detective—Deep  
382 learning tools for bat acoustic signal detection. *PLOS Computational Biology*. 2018;14(3):156869.
- 383 3. Walters CL, Freeman R, Collen A, Dietz C, Brock Fenton M, Jones G, et al. A continental-scale  
384 tool for acoustic identification of European bats. *Journal of Applied Ecology*. 2012;49(5):1064-74. doi:  
385 <https://doi.org/10.1111/j.1365-2664.2012.02182.x>.
- 386 4. Adavanne S, Drossos K, Cakir E, Virtanen T. Stacked convolutional and recurrent neural  
387 networks for bird audio detection. *European signal processing conference*. 2017:1729-33. doi:  
388 10.23919/EUSIPCO.2017.8081505.
- 389 5. Shamir L, Yerby C, Simpson R, Benda-Beckmann AMv, Tyack P, Samarra F, et al. Classification  
390 of large acoustic datasets using machine learning and crowdsourcing: Application to whale calls. *The*  
391 *Journal of the Acoustical Society of America*. 2014;135(2):953-62. doi:  
392 <https://doi.org/10.1121/1.4861348>.
- 393 6. Priyadarshani N, Marsland S, Castro I. Automated birdsong recognition in complex acoustic  
394 environments: a review. *Journal of Avian Biology*. 2018;49(5):jav-01447. doi:  
395 <https://doi.org/10.1111/jav.01447>.
- 396 7. Redgwell RD, Szewczak JM, Jones G, Parsons S. Classification of echolocation calls from 14  
397 species of bat by support vector machines and ensembles of neural networks. *Algorithms*.  
398 2009;2(3):907-24.
- 399 8. Sprengel E, Jaggi M, Kilcher Y, Hofmann T, editors. Audio based bird species identification using  
400 deep learning techniques. *LifeCLEF 2016*; 2016.
- 401 9. Kim G, Lu Y, Hu Y, Loizou PC. An algorithm that improves speech intelligibility in noise for  
402 normal-hearing listeners. *The Journal of the Acoustical Society of America*. 2009;126(3):1486-94. doi:  
403 10.1121/1.3184603.
- 404 10. Wang Y, Wang D. Towards Scaling Up Classification-Based Speech Separation. *IEEE*  
405 *Transactions on Audio, Speech, and Language Processing*. 2013;21(7):1381-90. doi:  
406 10.1109/TASL.2013.2250961.
- 407 11. Grais EM, Erdogan H, editors. Spectro-temporal post-smoothing in NMF based single-channel  
408 source separation. *Signal Processing Conference (EUSIPCO), 2012 Proceedings of the 20th European*;  
409 2012: IEEE.
- 410 12. Nugraha AA, Liutkus A, Vincent E. Deep Neural Network Based Multichannel Audio Source  
411 Separation. *Signals Commun Techn*. 2018:157-85. doi: 10.1007/978-3-319-73031-8\_7. PubMed PMID:  
412 WOS:000441018800008.
- 413 13. Wang D, Chen J. Supervised Speech Separation Based on Deep Learning: An Overview. *IEEE*  
414 *Transactions on Audio, Speech, and Language Processing*. 2018;26(10):1702-26. doi:  
415 10.1109/Taslp.2018.2842159. PubMed PMID: WOS:000438718300001.
- 416 14. Marchi E, Ferroni G, Eyben F, Gabrielli L, Squartini S, Schuller B, editors. Multi-resolution linear  
417 prediction based features for audio onset detection with bidirectional LSTM neural networks. 2014  
418 *IEEE international conference on acoustics, speech and signal processing (ICASSP)*; 2014: IEEE.
- 419 15. Weninger F, Hershey JR, Le Roux J, Schuller B, editors. Discriminatively trained recurrent neural

- 420 networks for single-channel speech separation. Proceedings 2nd IEEE Global Conference on Signal  
421 and Information Processing, GlobalSIP, Machine Learning Applications in Speech Processing  
422 Symposium, Atlanta, GA, USA; 2014.
- 423 16. Eck D, Graves A, Schmidhuber J. A new approach to continuous speech recognition using LSTM  
424 recurrent neural networks. Technical Report. 2003.
- 425 17. Beringer N, editor Human language acquisition methods in a machine learning task. Eighth  
426 International Conference on Spoken Language Processing; 2004.
- 427 18. Graves A, Beringer N, Schmidhuber J, editors. A Comparison Between Spiking and Differentiable  
428 Recurrent Neural Networks on Spoken Digit Recognition. international conference on modelling  
429 identification and control; 2004.
- 430 19. Graves A, Schmidhuber J. Framewise phoneme classification with bidirectional LSTM and other  
431 neural network architectures. *Neural Networks*. 2005;18(5):602-10. doi:  
432 <https://doi.org/10.1016/j.neunet.2005.06.042>.
- 433 20. Makino S. *Audio Source Separation*: Springer; 2018.
- 434 21. Hershey JR, Chen Z, Roux JL, Watanabe S, editors. Deep clustering: Discriminative embeddings  
435 for segmentation and separation. 2016 IEEE International Conference on Acoustics, Speech and Signal  
436 Processing (ICASSP); 2016 20-25 March 2016.
- 437 22. Wöllmer M, Eyben F, Graves A, Schuller B, Rigoll GJCC. Bidirectional LSTM networks for  
438 context-sensitive keyword detection in a cognitive virtual agent framework. 2010;2(3):180-90.
- 439 23. Huang Z, Xu W, Yu K. Bidirectional LSTM-CRF models for sequence tagging. arXiv preprint  
440 arXiv:150801991. 2015.
- 441 24. Li C, Zhu L, Xu S, Gao P, Xu B, editors. CBLDNN-Based Speaker-Independent Speech  
442 Separation Via Generative Adversarial Training. international conference on acoustics, speech, and  
443 signal processing; 2018.
- 444 25. Kunz TH, Fenton MB. *Bat ecology*: University of Chicago Press; 2005.
- 445 26. Gillam E, Fenton MB. Roles of acoustic social communication in the lives of bats. *Bat*  
446 *Bioacoustics*: Springer; 2016. p. 117-39.
- 447 27. Luo B, Huang X, Li Y, Lu G, Zhao J, Zhang K, et al. Social call divergence in bats: a comparative  
448 analysis. *Behavioral Ecology*. 2017;28(2):533-40. doi: 10.1093/beheco/arw184.
- 449 28. Pozzi L, Gamba M, Giacoma C. The Use of Artificial Neural Networks to Classify Primate  
450 Vocalizations: A Pilot Study on Black Lemurs. *Am J Primatol*. 2010;72(4):337-48. doi:  
451 10.1002/ajp.20786. PubMed PMID: WOS:000276124300007.
- 452 29. Jin L, Wang J, Zhang Z, Sun K, Kanwal JS, Feng J. Postnatal development of morphological and  
453 vocal features in Asian particolored bat, *Vespertilio sinensis*. *Mammalian Biology*. 2012;77(5):339-44.  
454 doi: 10.1016/j.mambio.2012.05.001. PubMed PMID: WOS:000309023900005.
- 455 30. Weng C, Yu D, Seltzer ML, Droppo J. Deep neural networks for single-channel multi-talker  
456 speech recognition. *IEEE Transactions on Audio, Speech, and Language Processing*.  
457 2015;23(10):1670-9. doi: 10.1109/Taslp.2015.2444659. PubMed PMID: WOS:000356518100012.
- 458 31. Naguib M, Riebel K. Bird song: a key model in animal communication. *Encyclopedia for*  
459 *language and linguistics*. 2006;2:40-53.
- 460 32. Filatova OA, Deecke VB, Ford JKB, Matkin CO, Barrett-Lennard LG, Guzeev MA, et al. Call  
461 diversity in the North Pacific killer whale populations: implications for dialect evolution and  
462 population history. *Animal behaviour*. 2012;83(3):595-603. doi:  
463 <https://doi.org/10.1016/j.anbehav.2011.12.013>.

- 464 33. Herzing DL. Clicks, whistles and pulses: Passive and active signal use in dolphin communication.  
465 Acta Astronautica. 2014;105(2):534-7. doi: 10.1016/j.actaastro.2014.07.003.  
466 34. Lecun Y, Bengio Y, Hinton G. Deep learning. Nature. 2015;521(7553):436. doi:  
467 10.1038/nature14539. PubMed PMID: 26017442.  
468 35. Goodfellow I, Bengio Y, Courville A. Deep Learning: The MIT Press; 2016.  
469 36. Kanwal JS, Matsumura S, Ohlemiller K, Suga N. Analysis of acoustic elements and syntax in  
470 communication sounds emitted by mustached bats. The Journal of the Acoustical Society of America.  
471 1994;96(3):1229-54. doi: <https://doi.org/10.1121/1.410273>.  
472 37. Ma J, Kobayasi K, Zhang S, Metzner W. Vocal communication in adult greater horseshoe bats,  
473 *Rhinolophus ferrumequinum*. Journal of comparative physiology A, Neuroethology, sensory, neural,  
474 and behavioral physiology. 2006;192(5):535-50. doi: <https://doi.org/10.1007/s00359-006-0094-9>.  
475 PubMed PMID: 16418857.

476

## 477 **Supporting information**

478 **S1 Table. A summary of calls used for model training.**

479 **S2 Fig. Training loss and validation loss during model training.**

480 **S3 Table. Statistical comparisons of principle components extracted from seven**

481 **parameters.** No significant differences were observed between parameters for

482 separated and original syllables. A one-way ANOVA was used to test the normal

483 distributed data and a two-sided Wilcoxon signed-rank test was used to assess the data

484 that did not conform well to a normal distribution.

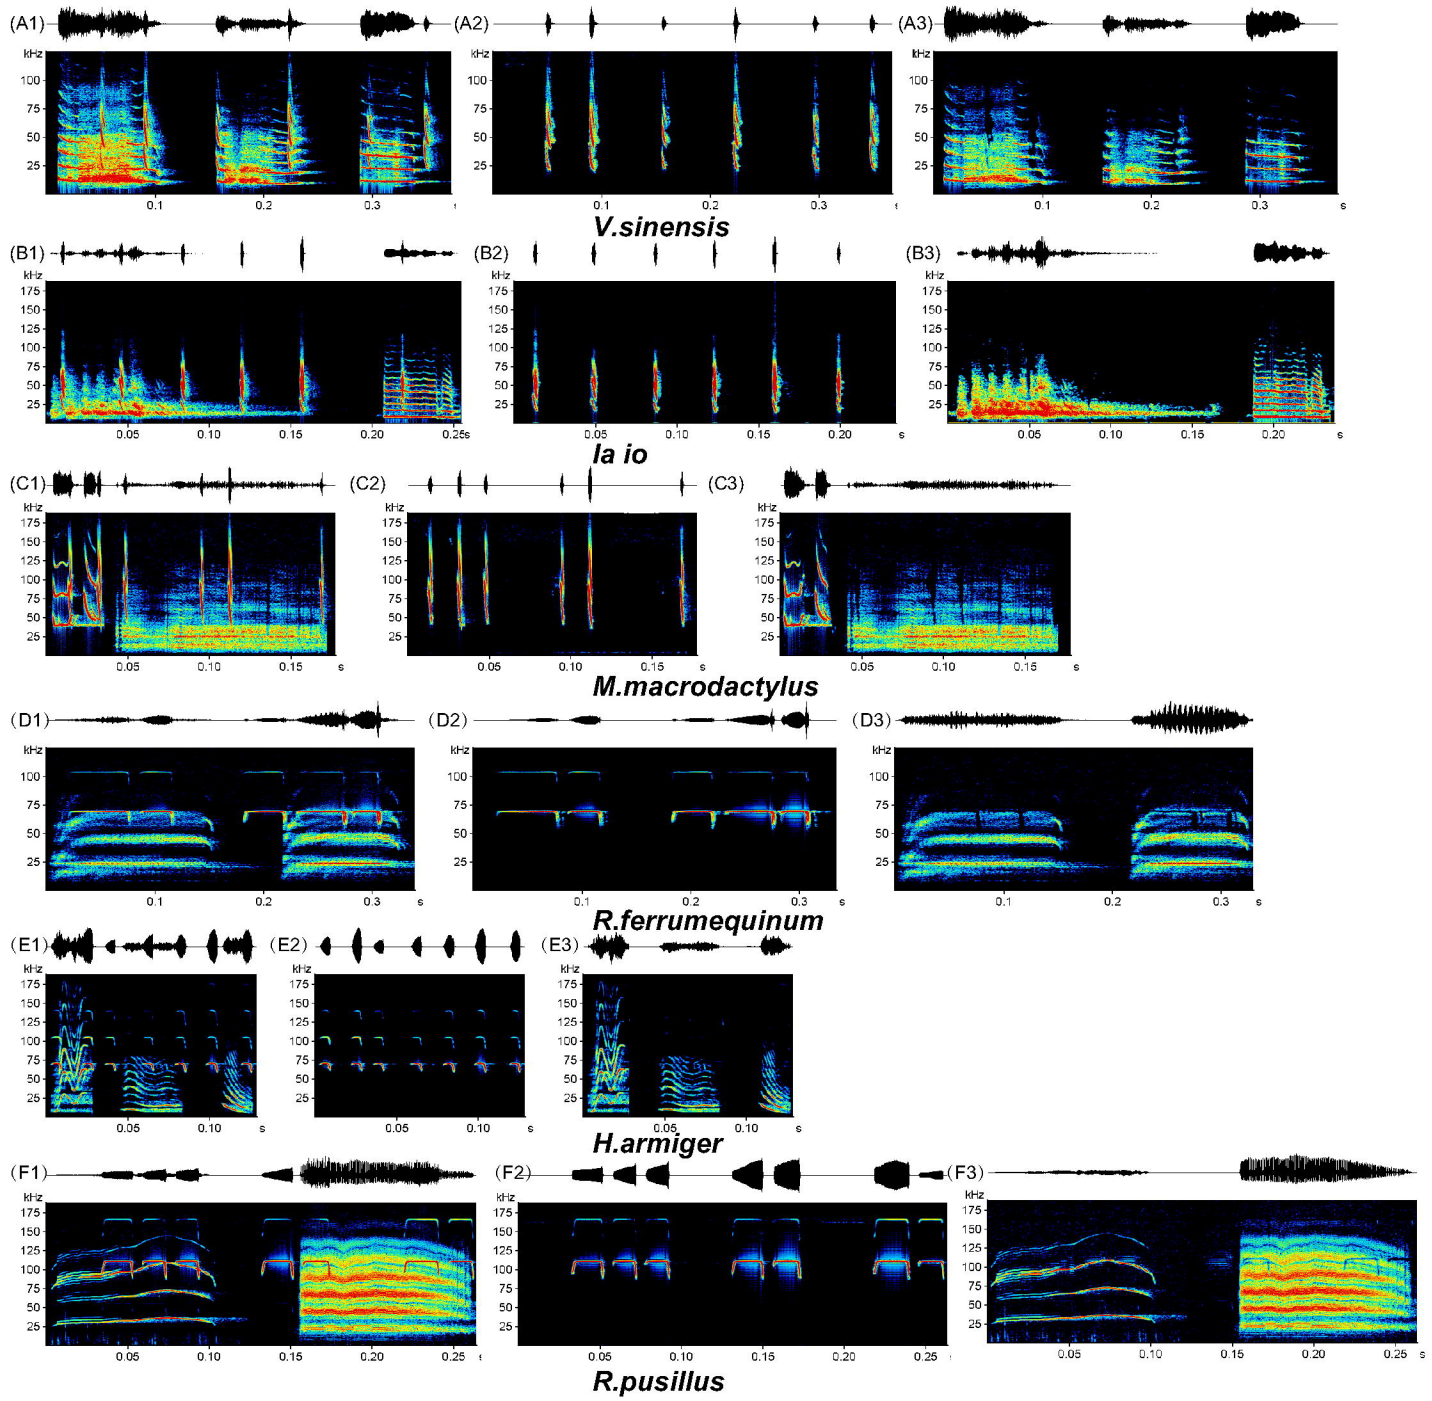



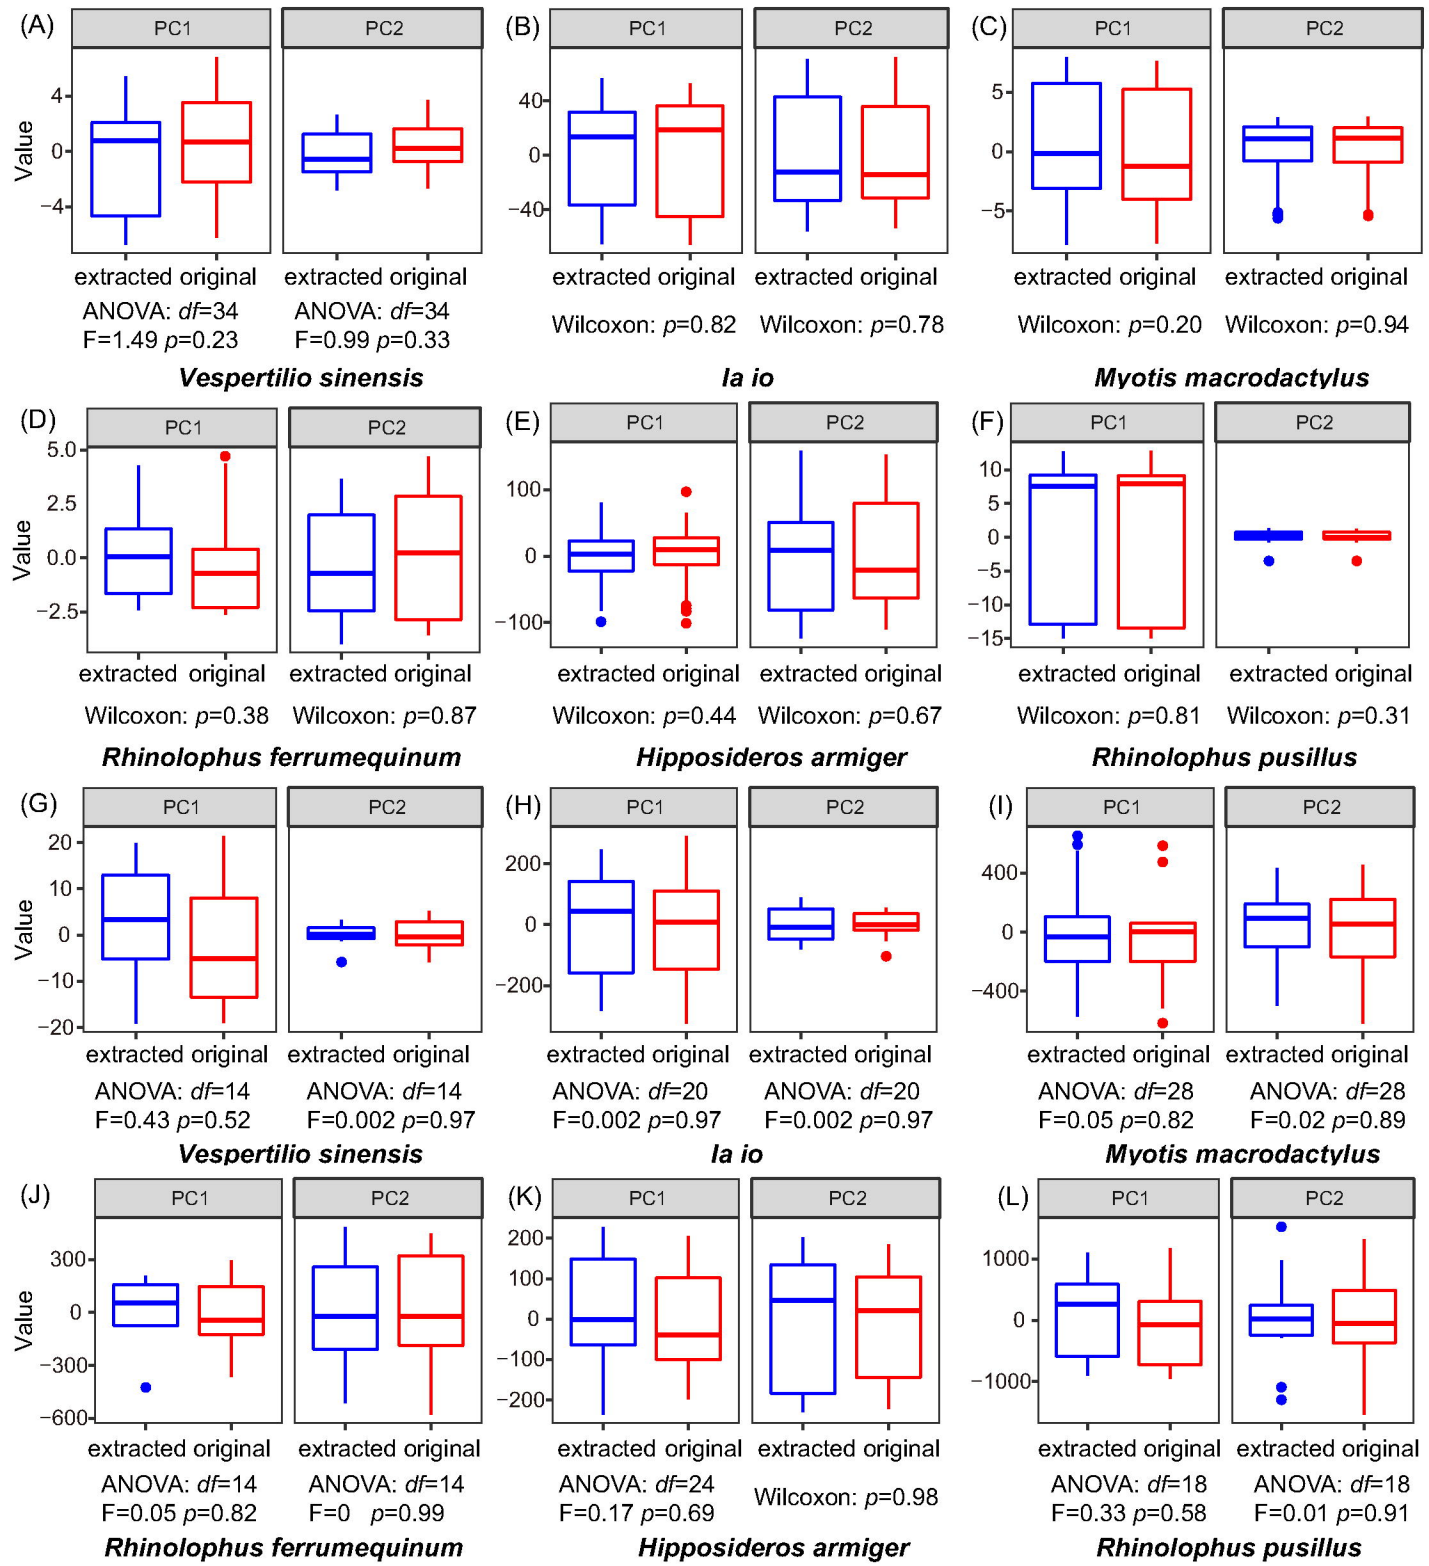

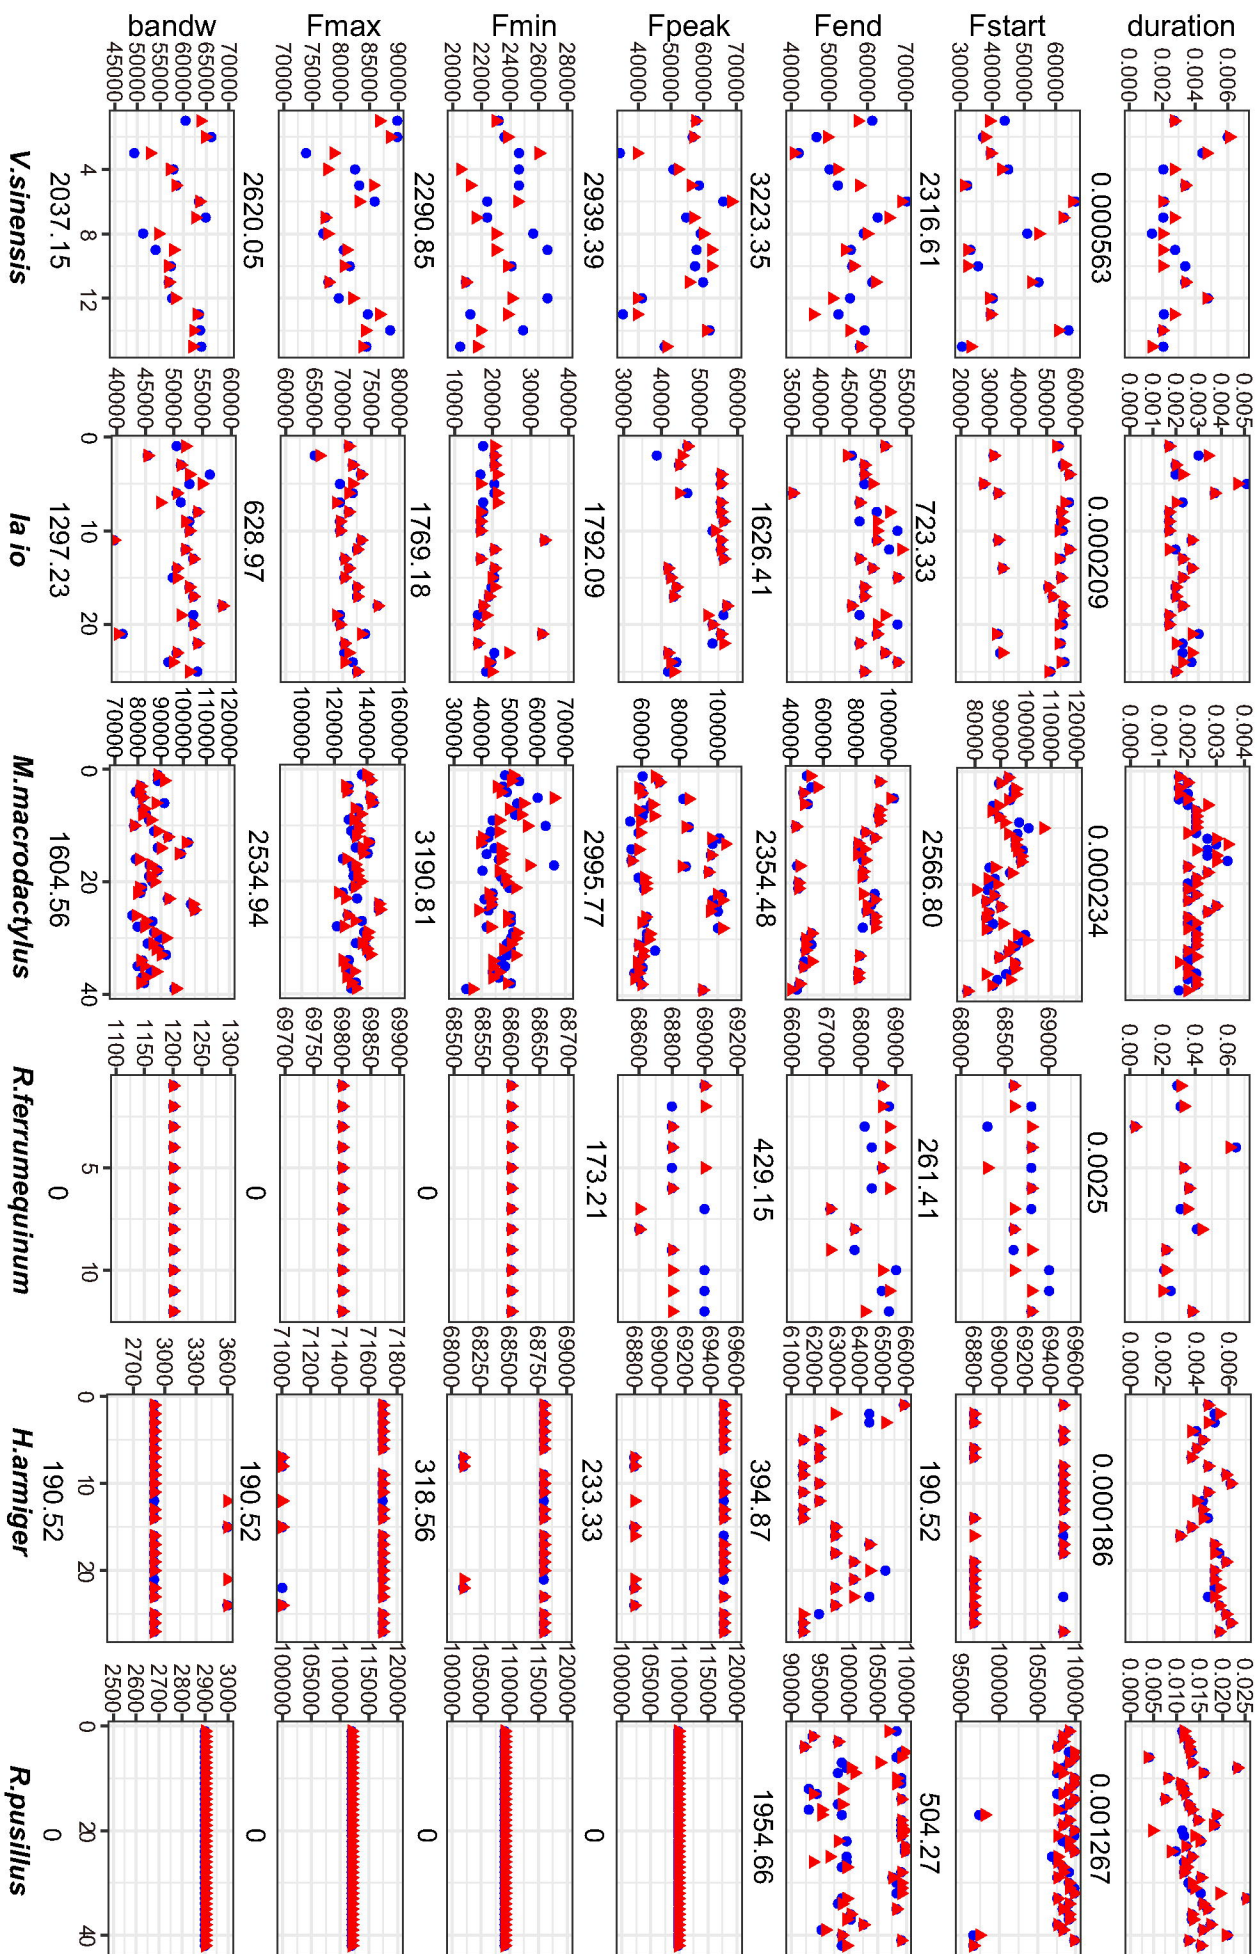



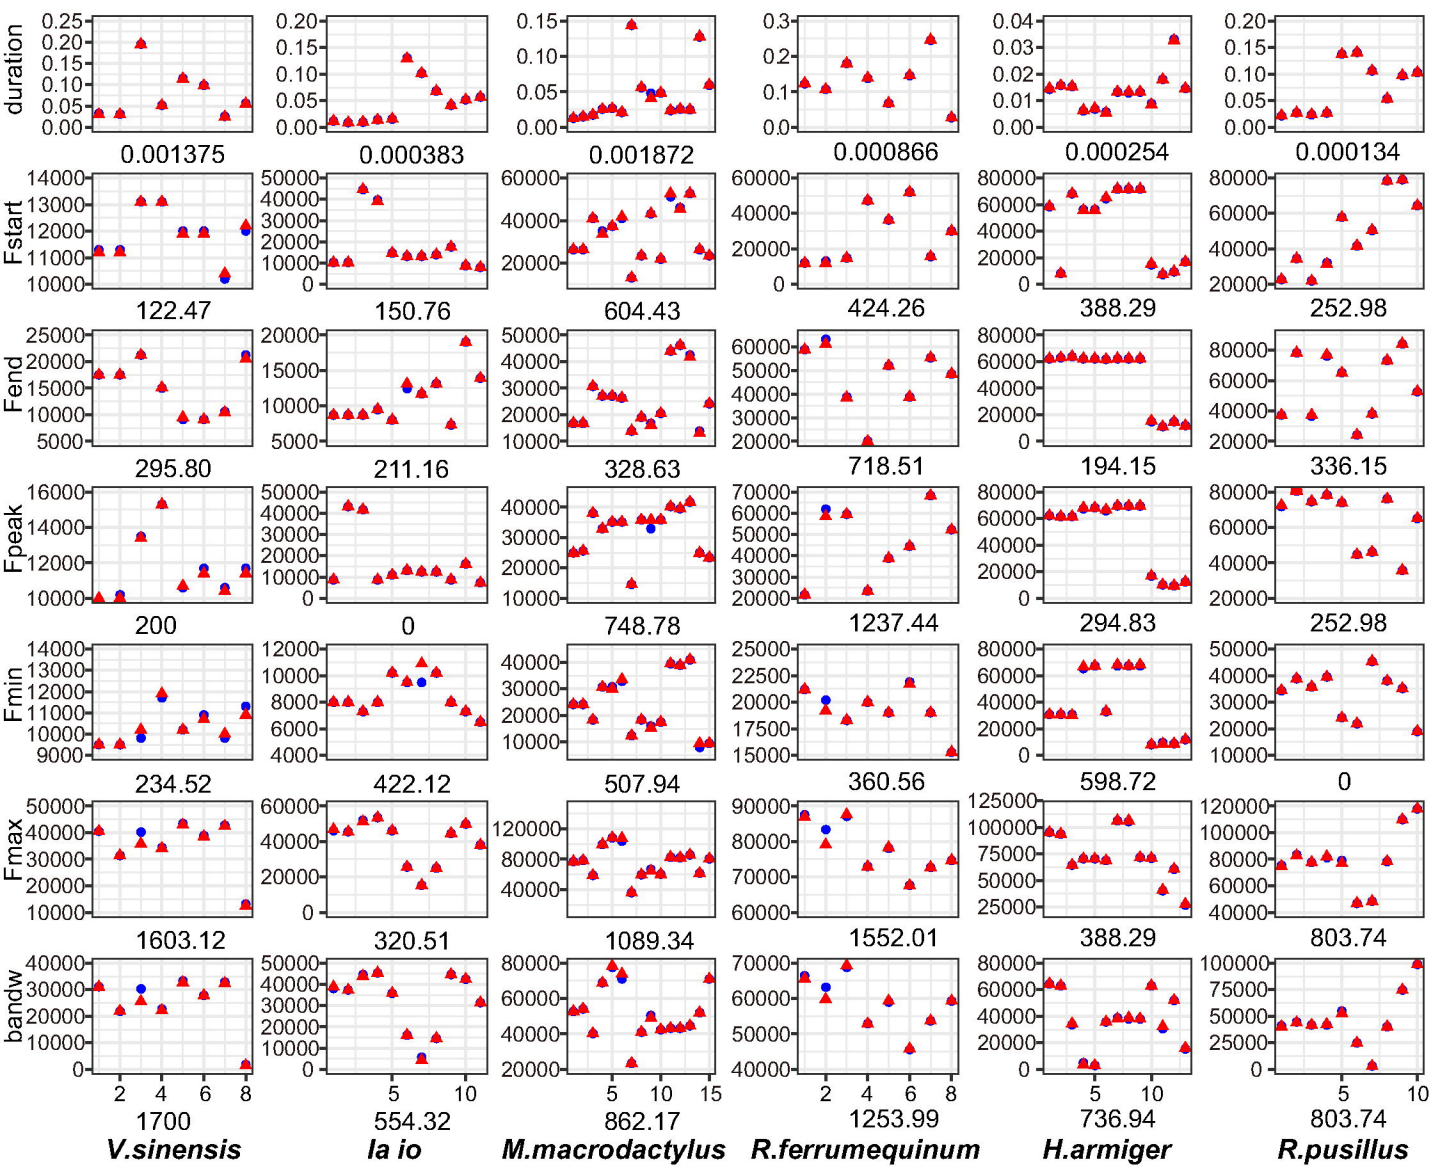

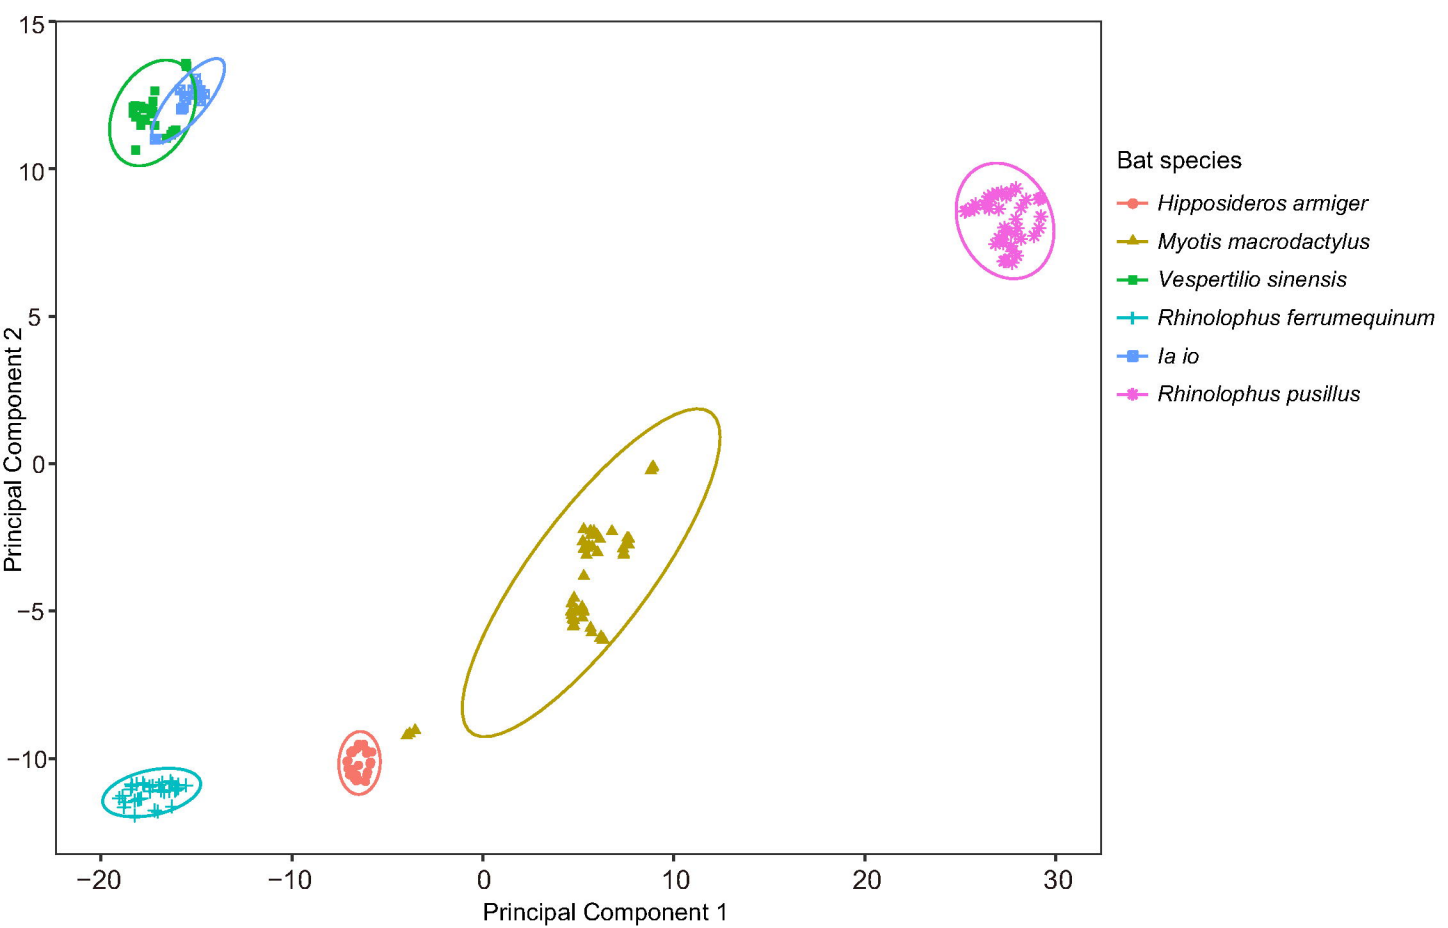

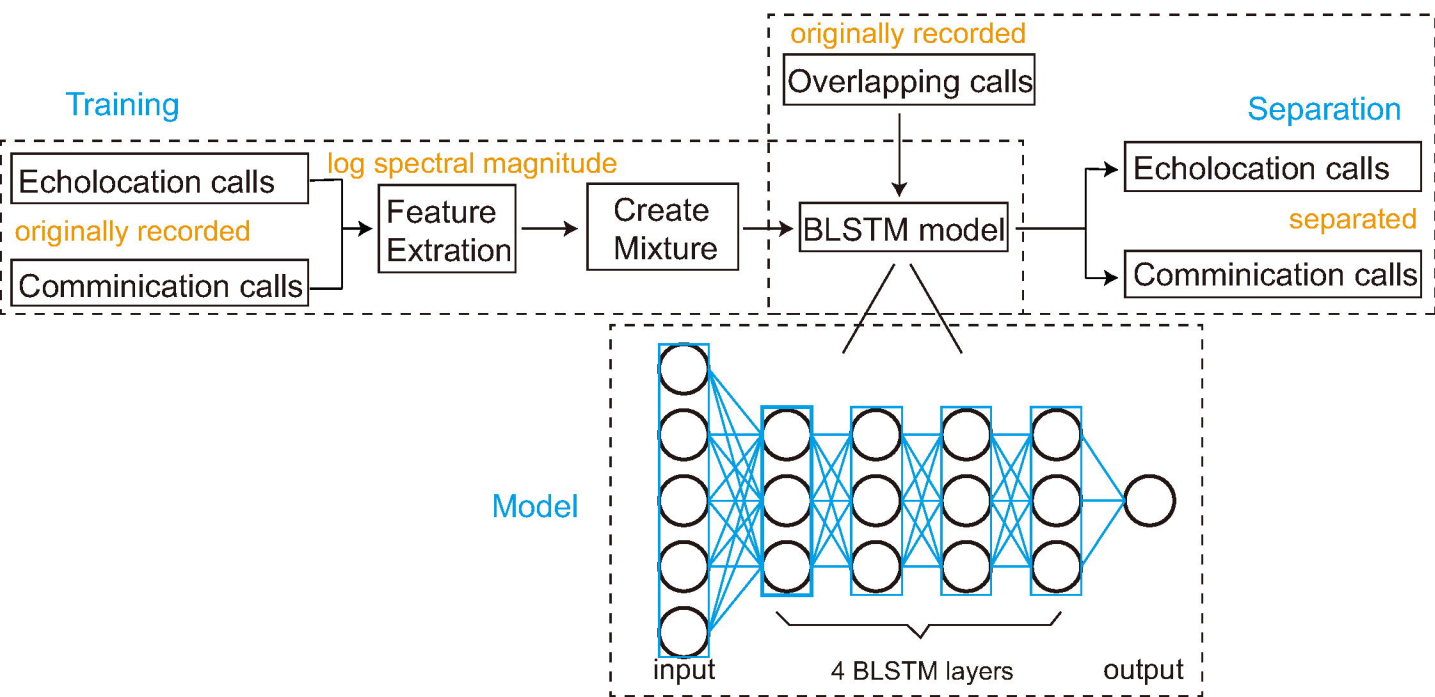

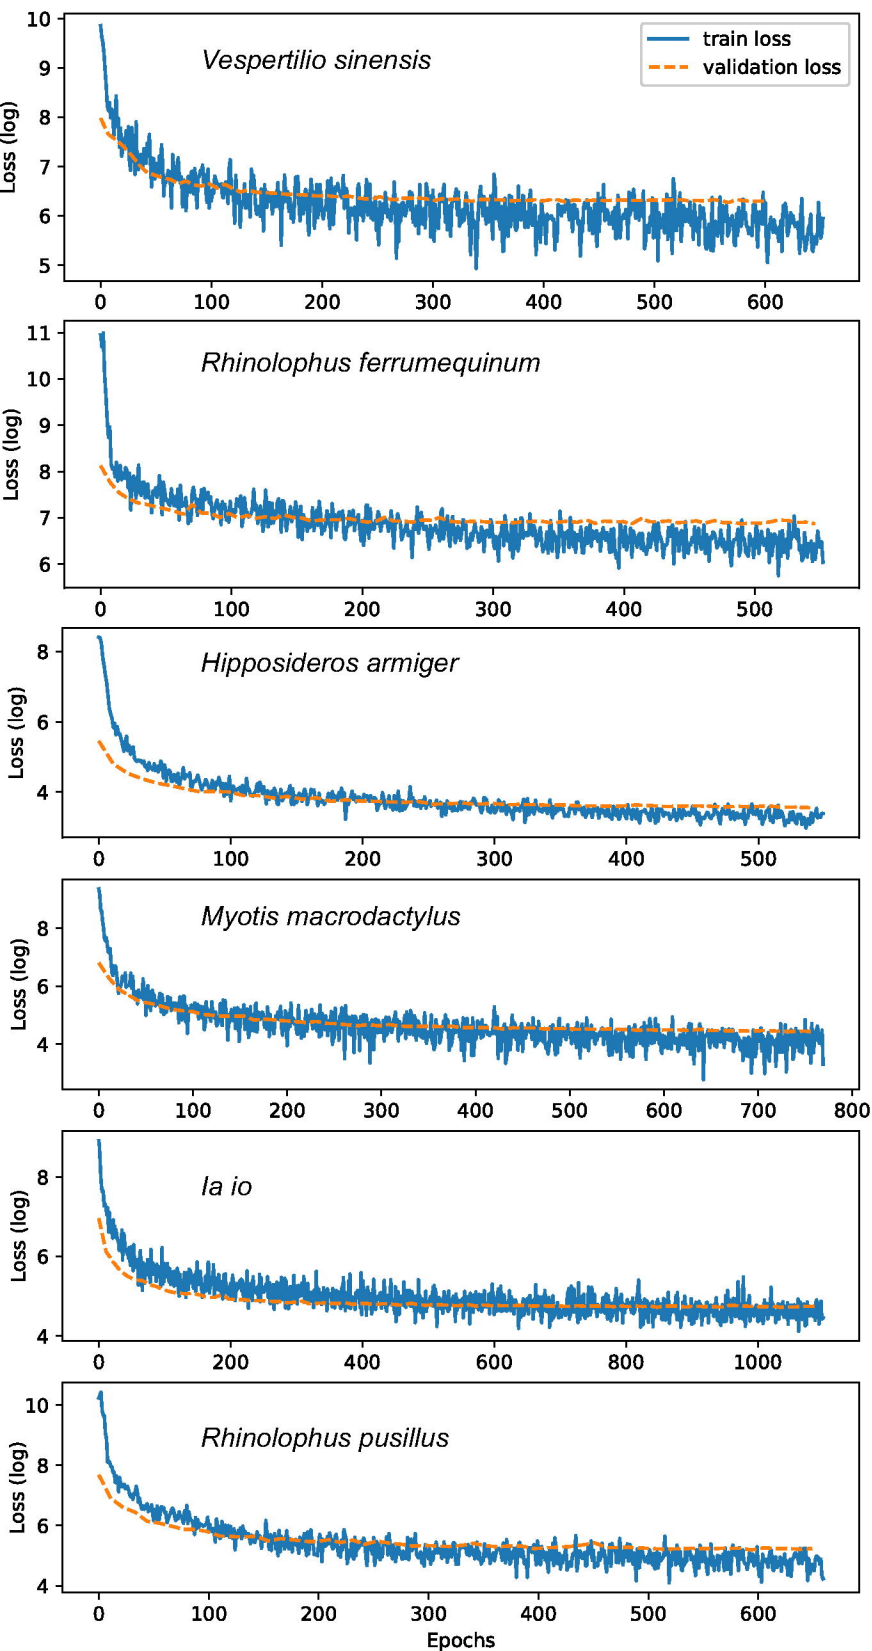

Source: https://www.biorxiv.org/content/10.1101/2019.12.15.876656v1.full.pdf
